# Supplementary material for: Performance of Modern and Traditional Spelt Wheat (Triticum spelta) Varieties in Rain-Fed and Irrigated, Organic and Conventional Production Systems in a Semi-Arid Environment; Results from Exploratory Field Experiments in Crete, Greece
Source: MDPI journal article supplement (doi:10.3390/agronomy11050890), 2021-05-01
Supplement: s1 [file s1]

# SUPPLEMENTARY MATERIAL

**Table S1.** Effects of growing season, irrigation and fertilizer type on spelt wheat (variety Rubiota) harvest index (HI), tillers and ears per m<sup>2</sup>, grain to hull ratio, thousand grain weight (TGW) and estimated leaf chlorophyll content (SPAD-meter readings)

| Factor                        | HI<br>%          | Tillers/<br>m <sup>2</sup> | Ears/<br>m <sup>2</sup> | Grain/ hull<br>ratio | TGW<br>g            | estimated leaf chlorophyll content (SPAD) |                    |                    |
|-------------------------------|------------------|----------------------------|-------------------------|----------------------|---------------------|-------------------------------------------|--------------------|--------------------|
|                               |                  |                            |                         |                      |                     | GS39*                                     | GS50               | GS62*              |
| <b>Season (n=24)</b>          |                  |                            |                         |                      |                     |                                           |                    |                    |
| 2014/15                       | 19 ±1 <b>a</b>   | 434 ±10 <b>a</b>           | 339 ±10 <b>a</b>        | 2.35 ±0.04 <b>a</b>  | 43.4 ±0.7 <b>a</b>  | 42.0 ±0.3                                 | 41.9 ±0.2 <b>a</b> | 39.4 ±0.3          |
| 2015/16                       | 11 ±1 <b>b</b>   | 307 ±20 <b>b</b>           | 173 ±13 <b>c</b>        | 1.52 ±0.11 <b>c</b>  | 35.8 ±0.6 <b>c</b>  | ND                                        | 38.5 ±1.0 <b>b</b> | ND                 |
| 2016/17                       | 22 ±1 <b>a</b>   | 332 ±12 <b>b</b>           | 264 ±14 <b>b</b>        | 2.05 ±0.05 <b>b</b>  | 38.7 ±0.9 <b>b</b>  | 39.8 ±1.0                                 | 42.8 ±0.6 <b>a</b> | 43.6 ±0.8          |
| <b>Fertilizer type (n=24)</b> |                  |                            |                         |                      |                     |                                           |                    |                    |
| Chicken manure                | 18 ±1 <b>ab</b>  | 355 ±21                    | 267 ±20                 | 1.95 ±0.10 <b>ab</b> | 38.7 ±1.0 <b>ab</b> | 39.8 ±0.9 <b>b</b>                        | 40.6 ±0.5 <b>b</b> | 40.8 ±0.7 <b>b</b> |
| Mineral NPK                   | 15 ±1 <b>b</b>   | 363 ±20                    | 252 ±23                 | 1.87 ±0.12 <b>b</b>  | 38.3 ±1.0 <b>b</b>  | 43.4 ±0.7 <b>a</b>                        | 43.1 ±0.7 <b>a</b> | 42.9 ±1.2 <b>a</b> |
| Sheep manure                  | 19 ±1 <b>a</b>   | 355 ±15                    | 257 ±12                 | 2.11 ±0.07 <b>a</b>  | 40.9 ±0.8 <b>a</b>  | 39.4 ±0.7 <b>b</b>                        | 39.4 ±0.9 <b>b</b> | 40.8 ±0.7 <b>b</b> |
| <b>Irrigation (n=36)</b>      |                  |                            |                         |                      |                     |                                           |                    |                    |
| With                          | 18 ±1            | 383 ±13                    | 277 ±14                 | 2.11 ±0.07           | 40.6 ±0.7           | 40.0 ±0.7                                 | 40.2 ±0.7          | 41.0 ±0.6          |
| Without                       | 16 ±1            | 333 ±16                    | 240 ±16                 | 1.84 ±0.09           | 38.0 ±0.9           | 41.7 ±0.8                                 | 41.9 ±0.5          | 42.0 ±0.9          |
| <b>ANOVA (p-value)</b>        |                  |                            |                         |                      |                     |                                           |                    |                    |
| <b>Main effects</b>           |                  |                            |                         |                      |                     |                                           |                    |                    |
| Season (YR)                   | <b>&lt;0.001</b> | <b>&lt;0.001</b>           | <b>&lt;0.001</b>        | <b>&lt;0.001</b>     | <b>&lt;0.001</b>    | ns                                        | <b>0.039</b>       | <b>0.009</b>       |
| Fertilizer type (FT)          | <b>0.034</b>     | ns                         | ns                      | <b>0.026</b>         | <b>0.044</b>        | <b>&lt;0.001</b>                          | <b>0.004</b>       | 0.050              |
| Irrigation (IR)               | 0.054            | <b>&lt;0.001</b>           | <b>0.008</b>            | <b>&lt;0.001</b>     | <b>0.003</b>        | <b>0.013</b>                              | <b>&lt;0.001</b>   | ns                 |
| <b>Interactions#</b>          |                  |                            |                         |                      |                     |                                           |                    |                    |
| YR x FT                       | ns               | <b>0.005</b>               | <b>0.021</b>            | <b>0.047</b>         | ns                  | <b>0.003</b>                              | ns                 | <b>0.006</b>       |
| YR x IR                       | <b>0.027</b>     | <b>0.004</b>               | 0.052                   | ns                   | ns                  | 0.073                                     | <b>&lt;0.001</b>   | <b>0.004</b>       |
| FT x IR                       | ns               | ns                         | ns                      | ns                   | ns                  | ns                                        | ns                 | ns                 |
| YR x FT x IR                  | ns               | ns                         | ns                      | ns                   | ns                  | ns                                        | ns                 | ns                 |

HI, harvest index; Means that are followed by the same letter within each column are not significant different (General Linear Hypothesis test  $p < 0.05$ );

<sup>1</sup>See Table 2 for interaction means ±SE; <sup>2</sup>See Table 3 for interaction means ±SE;

**Table S2.** Effects of growing season, irrigation, fertilizer type and variety choice on spelt wheat harvest index (HI), tillers and ears per m<sup>2</sup>, grain to hull ratio, thousand grain weight (TGW) and estimated leaf chlorophyll content (SPAD-meter readings)

|                              | HI<br>%           | Tillers/<br>m <sup>2</sup> | Ears/<br>m <sup>2</sup> | grain/hull<br>ratio | TGW<br>G           | estimated leaf chlorophyll content (SPAD) |                     |                     |
|------------------------------|-------------------|----------------------------|-------------------------|---------------------|--------------------|-------------------------------------------|---------------------|---------------------|
|                              |                   |                            |                         |                     |                    | GS39*                                     | GS50                | GS62*               |
| <b>Season (n=96)</b>         |                   |                            |                         |                     |                    |                                           |                     |                     |
| 2015/16                      | 11 ±1             | 317 ±9                     | 189 ±8                  | 1.4±0.06            | 36.2 ±0.4          | ND                                        | 40.1 ±0.6           | ND                  |
| 2016/17                      | 23 ±1             | 335 ±7                     | 284 ±8                  | 2.1±0.03            | 40.2 ±0.5          | 41.4 ±0.5                                 | 45.2 ±0.4           | 45.3 ±0.4           |
| <b>Fertility type (n=64)</b> |                   |                            |                         |                     |                    |                                           |                     |                     |
| Chicken manure               | 18 ±1 <b>a</b>    | 330 ±9                     | 249 ±11 <b>a</b>        | 1.8±0.07 <b>a</b>   | 38.8 ±0.6 <b>a</b> | 40.2 ±0.7 <b>b</b>                        | 41.9 ±0.5 <b>b</b>  | 43.8 ±0.7 <b>b</b>  |
| Mineral NPK                  | 13 ±1 <b>b</b>    | 328 ±11                    | 217 ±14 <b>b</b>        | 1.6±0.08 <b>b</b>   | 35.9 ±0.6 <b>b</b> | 45.2 ±0.7 <b>a</b>                        | 44.9 ±0.7 <b>a</b>  | 48.4 ±0.8 <b>a</b>  |
| Sheep manure                 | 20 ±1 <b>a</b>    | 321 ±9                     | 244 ± 9 <b>a</b>        | 1.9±0.05 <b>a</b>   | 39.8 ±0.6 <b>a</b> | 38.9 ±0.6 <b>b</b>                        | 41.2 ±0.8 <b>b</b>  | 43.8 ±0.5 <b>b</b>  |
| <b>Irrigation (n=96)</b>     |                   |                            |                         |                     |                    |                                           |                     |                     |
| With                         | 20 ±1             | 363 ±7                     | 280 ±9                  | 1.9±0.05            | 40.2 ±0.5          | 39.6 ±0.6                                 | 41.6 ±0.6           | 44.3 ±0.6           |
| Without                      | 14 ±1             | 289 ±7                     | 193 ±8                  | 1.6±0.06            | 36.1 ±0.5          | 43.2 ±0.7                                 | 43.7 ±0.5           | 46.3 ±0.7           |
| <b>Variety (n=48)</b>        |                   |                            |                         |                     |                    |                                           |                     |                     |
| Filderstolz                  | 19 ±1 <b>a</b>    | 320 ±11                    | 258 ±11 <b>a</b>        | 1.6±0.07 <b>b</b>   | 36.1 ±0.7 <b>b</b> | 44.0 ±1.0 <b>a</b>                        | 45.0 ±0.8 <b>a</b>  | 47.0 ±0.8 <b>a</b>  |
| Oberkulmer                   | 15 ±1 <b>b</b>    | 322 ±13                    | 229 ±14 <b>ab</b>       | 1.7±0.08 <b>b</b>   | 39.8 ±0.8 <b>a</b> | 40.5 ±0.9 <b>bc</b>                       | 42.3 ±0.7 <b>bc</b> | 45.3 ±0.7 <b>bc</b> |
| Rubiota                      | 16 ±1 <b>b</b>    | 320 ±12                    | 218 ±12 <b>b</b>        | 1.8±0.07 <b>ab</b>  | 37.3 ±0.6 <b>b</b> | 39.8 ±0.9 <b>c</b>                        | 40.6 ±0.7 <b>c</b>  | 43.6 ±0.8 <b>c</b>  |
| ZOR                          | 17 ±2 <b>ab</b>   | 343 ±10                    | 241 ±17 <b>ab</b>       | 1.9±0.10 <b>a</b>   | 39.5 ±0.6 <b>a</b> | 41.6 ±0.8 <b>b</b>                        | 42.8 ±0.9 <b>b</b>  | 45.5 ±1.0 <b>ab</b> |
| <b>ANOVA</b>                 |                   |                            |                         |                     |                    |                                           |                     |                     |
| <b>Main effects</b>          |                   |                            |                         |                     |                    |                                           |                     |                     |
| Season (YR)                  | <b>0.0012</b>     | ns                         | <b>0.0022</b>           | <b>0.0020</b>       | <b>0.0132</b>      | -                                         | 0.085               | -                   |
| Fertility type (FT)          | <b>0.0001</b>     | ns                         | <b>0.0405</b>           | <b>0.0015</b>       | <b>0.0031</b>      | <b>0.0001</b>                             | <b>0.003</b>        | <b>0.0016</b>       |
| Irrigation (IR)              | <b>&lt;0.0001</b> | <b>&lt;0.0001</b>          | <b>&lt;0.0001</b>       | <b>&lt;0.0001</b>   | <b>&lt;0.0001</b>  | <b>0.0352</b>                             | <b>0.0001</b>       | ns                  |
| Variety (SV)                 | <b>0.0025</b>     |                            | <b>0.0043</b>           | <b>0.0001</b>       | <b>&lt;0.0001</b>  | <b>0.0001</b>                             | <b>0.0001</b>       | <b>0.0031</b>       |
| <b>Interactions</b>          |                   |                            |                         |                     |                    |                                           |                     |                     |
| YR x FT                      |                   | <b>0.0094</b>              | <b>0.0388</b>           | <b>0.0085</b>       | ns                 | -                                         | ns                  | -                   |
| YR x IR                      |                   | <b>0.0086</b>              |                         | <b>0.0082</b>       | ns                 | -                                         | <b>0.0465</b>       | -                   |
| FT x IR                      | 0.0897            |                            | 0.0792                  |                     | ns                 | -                                         | ns                  | -                   |
| YR x SV                      | <b>0.0013</b>     | 0.0879                     | <b>0.0000</b>           | <b>0.0036</b>       | ns                 | -                                         | ns                  | -                   |
| FT x SV                      |                   |                            |                         |                     | ns                 | -                                         | ns                  | -                   |
| IR x SV                      |                   |                            |                         |                     | ns                 | -                                         | ns                  | -                   |
| YR x FT x IR                 | <b>0.0287</b>     |                            | 0.0860                  |                     | ns                 | -                                         | ns                  | -                   |
| YR x FT x IR x VR            |                   |                            |                         | <b>0.0386</b>       |                    | -                                         | ns                  | -                   |

HI, harvest index; TGW; thousand grain weight; means that are followed by the same letter within each column are not significant different (general linear hypothesis test  $p<0.05$ ); <sup>1</sup>See Table S3 for interaction means ±SE; <sup>2</sup>See Table S4 for interaction means ±SE; <sup>3</sup>See Table 6 for interaction means ±SE; <sup>4</sup>See Table 8 for interaction means ±SE; <sup>5</sup>See Table S5 for interaction means ±SE; \*, SPAD data for GS 39 and GS 62 were not available in 2016;

**Table S3.** Interaction means  $\pm$  SE for the effects of growing season (2015/16, 2016/17) and supplementary irrigation (with and without) on spelt wheat grain yield and yield related growth parameters

| Parameters                        | Season  | Supplementary Irrigation |                        |
|-----------------------------------|---------|--------------------------|------------------------|
|                                   |         | Irrigation +<br>(n=48)   | Irrigation –<br>(n=48) |
| Grain Yield<br>t ha <sup>-1</sup> | 2015/16 | 1.6 $\pm$ 0.1 A b        | 0.6 $\pm$ 0.1 B b      |
|                                   | 2016/17 | 3.9 $\pm$ 0.2 A a        | 1.6 $\pm$ 0.1 B a      |
| SPAD                              | 2015/16 | 38.6 $\pm$ 0.9 B b       | 41.7 $\pm$ 0.8 A b     |
|                                   | 2016/17 | 44.7 $\pm$ 0.5 A a       | 45.8 $\pm$ 0.5 A a     |
| Grain/hull<br>%                   | 2015/16 | 1.7 $\pm$ 0.07 A b       | 1.2 $\pm$ 0.07 B b     |
|                                   | 2016/17 | 2.2 $\pm$ 0.04 A a       | 2.0 $\pm$ 0.05 B a     |
| Tillers m <sup>2</sup>            | 2015/16 | 367 $\pm$ 12 A a         | 267 $\pm$ 10 B b       |
|                                   | 2016/17 | 359 $\pm$ 8 A a          | 311 $\pm$ 10 B a       |

For each parameter means labelled with capital letter within the same row or the same lower-case letter within the same column are not significant different (General Linear Hypothesis test  $p < 0.05$ )

**Table S4.** Interaction means  $\pm$  SE for the effects of growing season (2015/16, 2016/17) and fertilizer type (chicken manure, mineral NPK, sheep manure) on spelt wheat grain crude protein content and yield related growth parameters

| Parameters                   | Season  | Fertilizer type          |                       |                        |
|------------------------------|---------|--------------------------|-----------------------|------------------------|
|                              |         | Chicken manure<br>(n=32) | Mineral NPK<br>(n=32) | Sheep manure<br>(n=32) |
| Plant height (cm)<br>at GS62 | 2015/16 | 85 $\pm$ 3 A b           | 82 $\pm$ 3 A b        | 86 $\pm$ 3 A b         |
|                              | 2016/17 | 104 $\pm$ 3 B a          | 114 $\pm$ 4 A a       | 103 $\pm$ 3 B a        |
| Tillers m <sup>2</sup>       | 2015/16 | 326 $\pm$ 16 A a         | 289 $\pm$ 16 B b      | 337 $\pm$ 15 A a       |
|                              | 2016/17 | 334 $\pm$ 11 B a         | 367 $\pm$ 12 A a      | 304 $\pm$ 10 B b       |
| Ears m <sup>2</sup>          | 2015/16 | 201 $\pm$ 14 A b         | 151 $\pm$ 14 B b      | 214 $\pm$ 12 A b       |
|                              | 2016/17 | 297 $\pm$ 14 A a         | 282 $\pm$ 19 A a      | 274 $\pm$ 10 A a       |
| Grain /hull ratio            | 2015/16 | 1.4 $\pm$ 0.10 B b       | 1.1 $\pm$ 0.09 C b    | 1.7 $\pm$ 0.08 A b     |
|                              | 2016/17 | 2.1 $\pm$ 0.05 A a       | 2.0 $\pm$ 0.07 A a    | 2.1 $\pm$ 0.04 A a     |

For each parameter means labelled with capital letter within the same row or the same lower case letter within the same column are not significant different (General Linear Hypothesis test  $p < 0.05$ )

**Table S5.** Interaction means  $\pm$  SE for the effects of growing season (2015/16, 2016/17), supplementary irrigation (with or without) and fertilizer type (chicken manure, mineral NPK, sheep manure) on spelt wheat grain yield and harvest index

| Mean $\pm$ SE      |         |              | Fertilizer Type          |                       |                        |
|--------------------|---------|--------------|--------------------------|-----------------------|------------------------|
| Parameter          | Season  | Irrigation   | Chicken manure<br>(n=16) | Mineral NPK<br>(n=16) | Sheep manure<br>(n=16) |
| Harvest Index<br>% | 2015/16 | Irrigation + | 15.2 $\pm$ 1.4 A c       | 9.9 $\pm$ 1.1 B b     | 15.2 $\pm$ 1.3 A b     |
|                    |         | Irrigation - | 8.8 $\pm$ 1.5 AB d       | 5.8 $\pm$ 1.1 B c     | 10.4 $\pm$ 1.0 A c     |
|                    | 2015/17 | Irrigation + | 27.3 $\pm$ 0.8 A a       | 24.9 $\pm$ 0.8 A a    | 27.7 $\pm$ 0.7 A a     |
|                    |         | Irrigation - | 21.6 $\pm$ 1.9 A b       | 11.7 $\pm$ 1.4 B b    | 24.7 $\pm$ 0.8 A a     |

For each parameter assessed means labelled with capital letter within the same row or the same lower case letter within the same column are not significantly different (General Linear Hypothesis test  $p < 0.05$ )

**Table S6.** Interaction means  $\pm$  SE for the effects of growing season (2015/16, 2016/17), supplementary irrigation (with or without) and fertilizer type (chicken manure, mineral NPK, sheep manure) and variety choice (Filderstolz, Oberkulmer, Rubiota, ZOR) on spelt wheat grain/hull ratio and crude protein content

| Season            |             | With Supplementary Irrigation |    |    |                   |    |     |                    |    |     | Without Supplementary Irrigation |    |    |                   |    |    |                    |    |     |
|-------------------|-------------|-------------------------------|----|----|-------------------|----|-----|--------------------|----|-----|----------------------------------|----|----|-------------------|----|----|--------------------|----|-----|
|                   |             | Fertilizer type               |    |    |                   |    |     |                    |    |     | Fertilizer type                  |    |    |                   |    |    |                    |    |     |
|                   |             | Chicken manure (n=4)          |    |    | Mineral NPK (n=4) |    |     | Sheep manure (n=4) |    |     | Chicken manure (n=4)             |    |    | Mineral NPK (n=4) |    |    | Sheep manure (n=4) |    |     |
| Grain/hull ratio  |             |                               |    |    |                   |    |     |                    |    |     |                                  |    |    |                   |    |    |                    |    |     |
| 2015/16           | Filderstolz | 1.5 $\pm$ 0.17                | AB | d  | 1.7 $\pm$ 0.11    | A  | cd  | 1.9 $\pm$ 0.14     | A  | bc  | 1.1 $\pm$ 0.12                   | BC | d  | 0.7 $\pm$ 0.21    | C  | c  | 1.2 $\pm$ 0.15     | B  | b   |
|                   | Oberkulmer  | 1.8 $\pm$ 0.16                | A  | cd | 1.1 $\pm$ 0.24    | B  | e   | 1.7 $\pm$ 0.23     | A  | c   | 1.1 $\pm$ 0.36                   | B  | d  | 1.1 $\pm$ 0.37    | B  | c  | 1.5 $\pm$ 0.14     | A  | cd  |
|                   | Rubiota     | 1.7 $\pm$ 0.23                | A  | cd | 1.5 $\pm$ 0.24    | AB | d   | 1.9 $\pm$ 0.16     | A  | bc  | 1.2 $\pm$ 0.30                   | BC | cd | 1.0 $\pm$ 0.15    | C  | c  | 1.8 $\pm$ 0.22     | A  | bc  |
|                   | ZOR         | 2.2 $\pm$ 0.07                | A  | ab | 1.2 $\pm$ 0.31    | B  | e   | 2.1 $\pm$ 0.28     | A  | abc | 1.0 $\pm$ 0.19                   | BC | d  | 0.8 $\pm$ 0.22    | C  | c  | 1.3 $\pm$ 0.28     | B  | d   |
| 2016/17           | Filderstolz | 2.2 $\pm$ 0.07                | A  | bc | 1.9 $\pm$ 0.23    | AB | bcd | 2.0 $\pm$ 0.11     | AB | bc  | 1.7 $\pm$ 0.04                   | B  | bc | 1.9 $\pm$ 0.13    | AB | ab | 1.9 $\pm$ 0.07     | AB | abc |
|                   | Oberkulmer  | 2.0 $\pm$ 0.03                | AB | bc | 2.0 $\pm$ 0.05    | AB | bc  | 2.2 $\pm$ 0.14     | A  | ab  | 2.0 $\pm$ 0.13                   | AB | ab | 1.7 $\pm$ 0.26    | B  | b  | 2.0 $\pm$ 0.08     | AB | ab  |
|                   | Rubiota     | 2.2 $\pm$ 0.03                | A  | ab | 2.2 $\pm$ 0.05    | A  | ab  | 2.1 $\pm$ 0.04     | AB | abc | 2.0 $\pm$ 0.06                   | AB | ab | 1.8 $\pm$ 0.18    | B  | b  | 2.0 $\pm$ 0.03     | AB | ab  |
|                   | ZOR         | 2.5 $\pm$ 0.02                | A  | a  | 2.7 $\pm$ 0.08    | A  | a   | 2.5 $\pm$ 0.15     | A  | a   | 2.3 $\pm$ 0.07                   | A  | a  | 2.3 $\pm$ 0.09    | A  | a  | 2.4 $\pm$ 0.05     | A  | a   |
| Crude protein (%) |             |                               |    |    |                   |    |     |                    |    |     |                                  |    |    |                   |    |    |                    |    |     |
| 2015/16           | Filderstolz | 10.1 $\pm$ 0.5                | B  | a  | 10.8 $\pm$ 0.6    | AB | a   | 10.1 $\pm$ 0.3     | AB | a   | 12.3 $\pm$ 0.5                   | AB | a  | 13.3 $\pm$ 0.5    | A  | a  | 12.4 $\pm$ 0.6     | AB | a   |
|                   | Oberkulmer  | 11.4 $\pm$ 0.7                | B  | a  | 12.6 $\pm$ 0.3    | AB | a   | 12.3 $\pm$ 0.6     | AB | a   | 14.3 $\pm$ 0.2                   | A  | a  | 14.9 $\pm$ 0.8    | A  | a  | 13.3 $\pm$ 0.6     | AB | a   |
|                   | Rubiota     | 12.3 $\pm$ 0.4                | B  | a  | 13.3 $\pm$ 0.7    | AB | a   | 11.8 $\pm$ 0.4     | B  | a   | 13.9 $\pm$ 0.9                   | AB | a  | 15.7 $\pm$ 0.8    | A  | a  | 13.9 $\pm$ 0.7     | AB | a   |
|                   | ZOR         | 10.1 $\pm$ 0.2                | B  | a  | 12.4 $\pm$ 1.0    | A  | a   | 10.3 $\pm$ 0.5     | B  | a   | 11.9 $\pm$ 0.2                   | AB | a  | 14.1 $\pm$ 0.4    | A  | a  | 12.3 $\pm$ 0.7     | AB | a   |
| 2016/17           | Filderstolz | 9.3 $\pm$ 0.3                 | B  | b  | 12.2 $\pm$ 0.9    | A  | a   | 9.7 $\pm$ 0.4      | AB | b   | 11.8 $\pm$ 0.7                   | AB | b  | 13.2 $\pm$ 1.4    | A  | c  | 12.0 $\pm$ 0.4     | AB | a   |
|                   | Oberkulmer  | 11.6 $\pm$ 0.4                | B  | ab | 13.9 $\pm$ 0.2    | AB | a   | 12.9 $\pm$ 1.2     | AB | a   | 14.3 $\pm$ 0.9                   | AB | a  | 15.3 $\pm$ 1.1    | A  | bc | 13.5 $\pm$ 0.9     | AB | a   |
|                   | Rubiota     | 12.5 $\pm$ 0.6                | BC | a  | 14.9 $\pm$ 0.9    | B  | a   | 11.6 $\pm$ 0.4     | C  | ab  | 14.0 $\pm$ 1.3                   | B  | ab | 17.1 $\pm$ 0.5    | A  | b  | 13.9 $\pm$ 0.8     | B  | a   |
|                   | ZOR         | 9.9 $\pm$ 0.1                 | C  | ab | 13.6 $\pm$ 0.5    | B  | a   | 9.9 $\pm$ 0.4      | C  | ab  | 12.5 $\pm$ 0.9                   | BC | ab | 20.1 $\pm$ 5.1    | A  | a  | 13.1 $\pm$ 1.3     | B  | a   |

For each parameter assessed means labelled with capital letter within the same row or the same lower case letter within the same column are not significant different (General Linear Hypothesis test  $p < 0.05$ )
